# Supplementary material for: Construction of N-7 methylguanine-related mRNA prognostic model in uterine corpus endometrial carcinoma based on multi-omics data and immune-related analysis
Source: PubMed Central journal article supplement (PMC9637130; doi:10.1038/s41598-022-22879-6), 2022-11-05

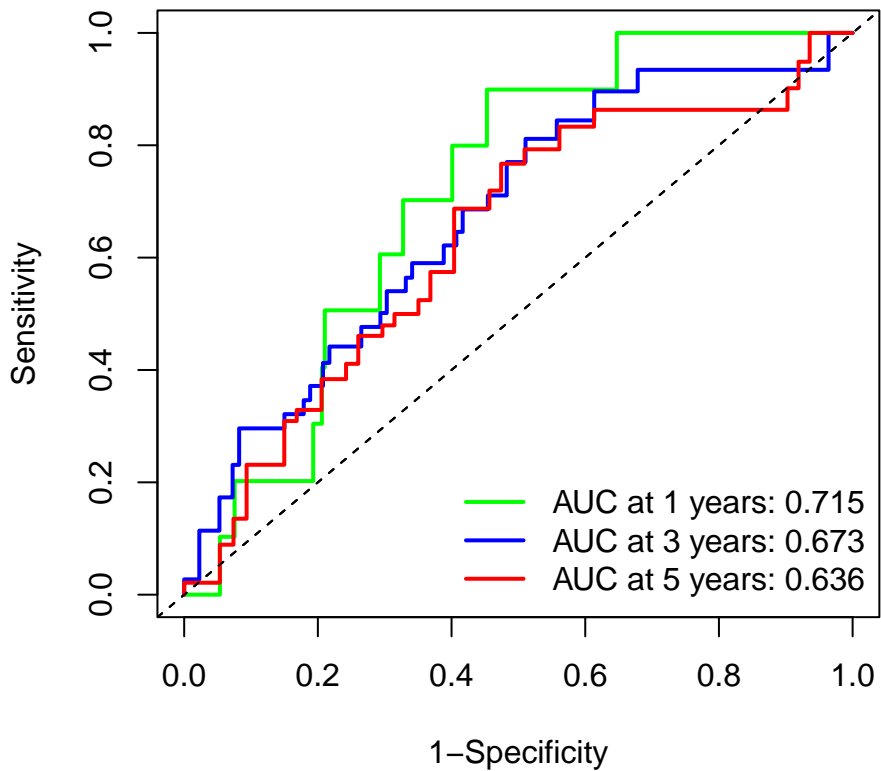

Supplement: 41598_2022_22879_MOESM4_ESM.pdf [file 41598_2022_22879_MOESM4_ESM.pdf]
