# Supplementary material for: Construction of N-7 methylguanine-related mRNA prognostic model in uterine corpus endometrial carcinoma based on multi-omics data and immune-related analysis
Source: PubMed Central journal article supplement (PMC9637130; doi:10.1038/s41598-022-22879-6), 2022-11-05
Supplement: 41598_2022_22879_MOESM5_ESM.pdf [file 41598_2022_22879_MOESM5_ESM.pdf]

Risk + High risk + Low risk

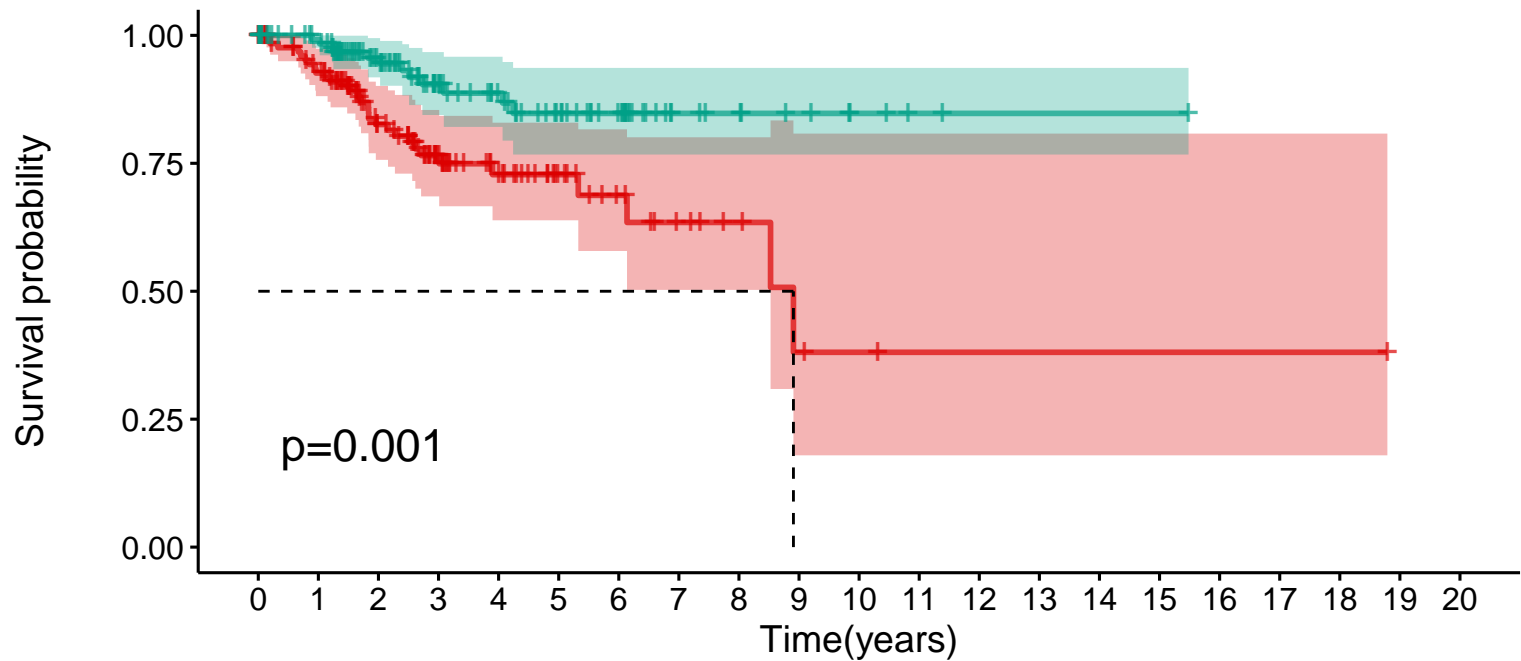

| Risk      | 0   | 1   | 2  | 3  | 4  | 5  | 6  | 7  | 8  | 9 | 10 | 11 | 12 | 13 | 14 | 15 | 16 | 17 | 18 | 19 | 20 |
|-----------|-----|-----|----|----|----|----|----|----|----|---|----|----|----|----|----|----|----|----|----|----|----|
| High risk | 135 | 111 | 74 | 49 | 34 | 21 | 14 | 9  | 6  | 3 | 2  | 1  | 1  | 1  | 1  | 1  | 1  | 1  | 1  | 0  | 0  |
| Low risk  | 135 | 120 | 85 | 57 | 46 | 35 | 26 | 12 | 10 | 7 | 4  | 2  | 1  | 1  | 1  | 1  | 0  | 0  | 0  | 0  | 0  |

Time(years)
