# Supplementary material for: Construction of N-7 methylguanine-related mRNA prognostic model in uterine corpus endometrial carcinoma based on multi-omics data and immune-related analysis
Source: PubMed Central journal article supplement (PMC9637130; doi:10.1038/s41598-022-22879-6), 2022-11-05
Supplement: 41598_2022_22879_MOESM7_ESM.pdf [file 41598_2022_22879_MOESM7_ESM.pdf]

Risk + High risk + Low risk

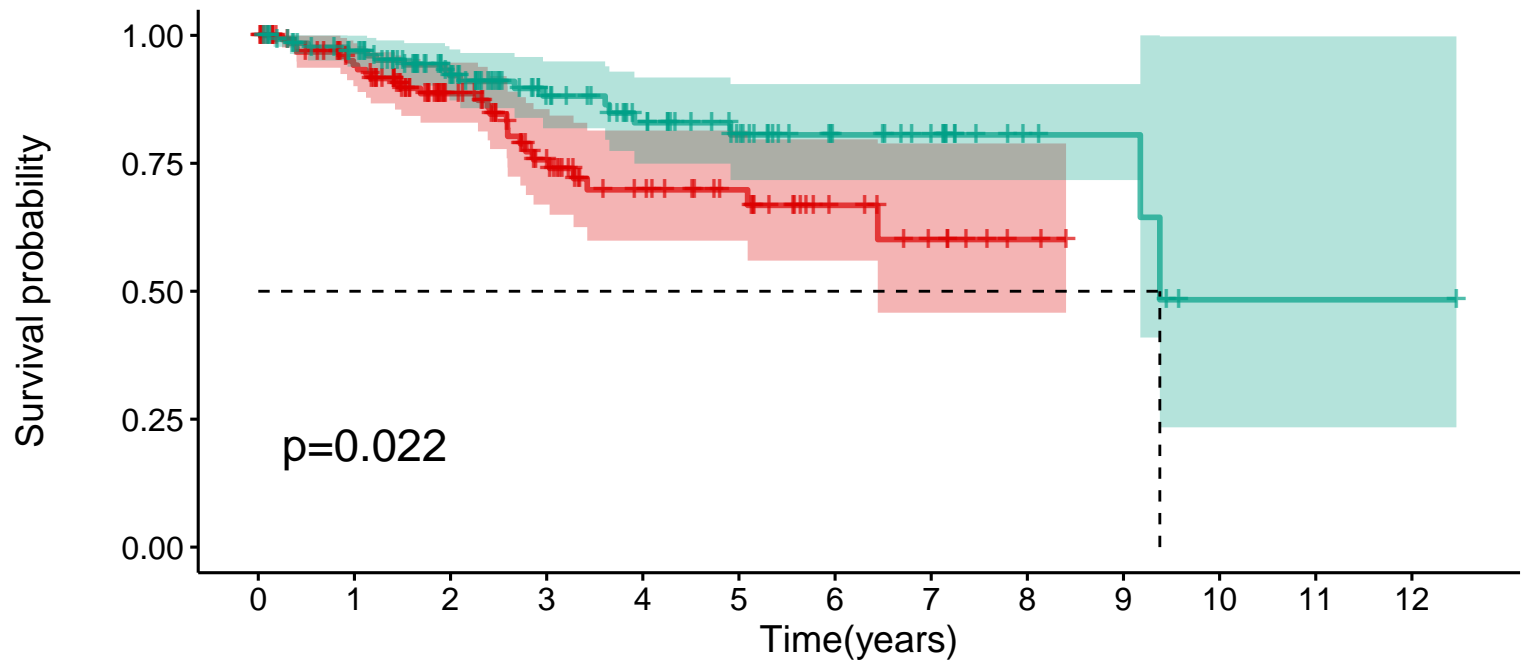

| Risk      | 0   | 1   | 2  | 3  | 4  | 5  | 6  | 7  | 8 | 9 | 10 | 11 | 12 |
|-----------|-----|-----|----|----|----|----|----|----|---|---|----|----|----|
| High risk | 134 | 109 | 71 | 46 | 30 | 23 | 12 | 7  | 2 | 0 | 0  | 0  | 0  |
| Low risk  | 135 | 118 | 86 | 58 | 44 | 32 | 20 | 15 | 6 | 5 | 1  | 1  | 1  |

Time(years)
